# Supplementary material
Source: publisher figshare collection journal article supplement (https://asha.figshare.com/articles/dataset/_/28394993)
Supplement: Supplementary file 2 [file 1]

## **Supplemental Material S1. Semi-structured interview guide.**

### Introduction

*“Thank you for agreeing to participate. We are very interested to hear about your experiences living with aphasia. We want to learn what makes people with aphasia successful or helps them thrive and how they cope with communication challenges.”*

*“During the interview, we will ask some open-ended questions. There is no right or wrong answer. We want to learn from you about your experiences, thoughts, and feelings. If you don’t understand a question right away, that is ok. We will provide support throughout the interview to help you understand and respond as best as possible. This interview will last approximately 30-60 minutes.”*

### Questions

1. “First, we will review some of your responses from phase one.”
  - a. *Refer to PTGI-Aphasia and specifically address one “a” question from each of the five categories to which the participant responded “yes.” Questions with the highest ratings will be selected.*
    - i. [Read the question] “When you responded to this question, you answered “yes.” What has contributed to this change? Describe a time when you noticed this change.”
  - b. *Refer to BPSNF and specifically address one question from each category to which the participant responded with a rating of 4 or 5 for odd-numbered items. Questions with the highest ratings will be selected.*
    - i. [Read the statement] “What caused you to answer this way? Describe a time when you experienced this recently.”
  - c. *Refer to SLARS*
    - i. “When you answered this question [refer to SLARS question], you indicated that you think you are [very successful, successful, somewhat successful, not successful, not at all successful]. Please describe why you responded this way. What do you think contributes to your success/lack of success?”
2. “Describe what a good day looks like for you (What do you do? Who are you with? What situations are you in? What is it like to communicate?). How often do you have a good day?”
3. “It is normal for people with aphasia to feel like they communicate better in some situations and worse in others. What is a situation in which you find it hard to communicate? How do you react when faced with this situation? What strategies do you find helpful?” [Continue to ask for another example until the participant cannot think of others]

### Conclusion

*“That concludes our interview. Thank you so much for sharing your thoughts and perspective. If you have additional comments or questions, please feel free to contact Dr. Tyson Harmon.”*
